# Supplementary material
Source: publisher figshare collection journal article supplement (https://frontiersin.figshare.com/ndownloader/files/23657840)
Supplement: Supplementary file [file 23657840]

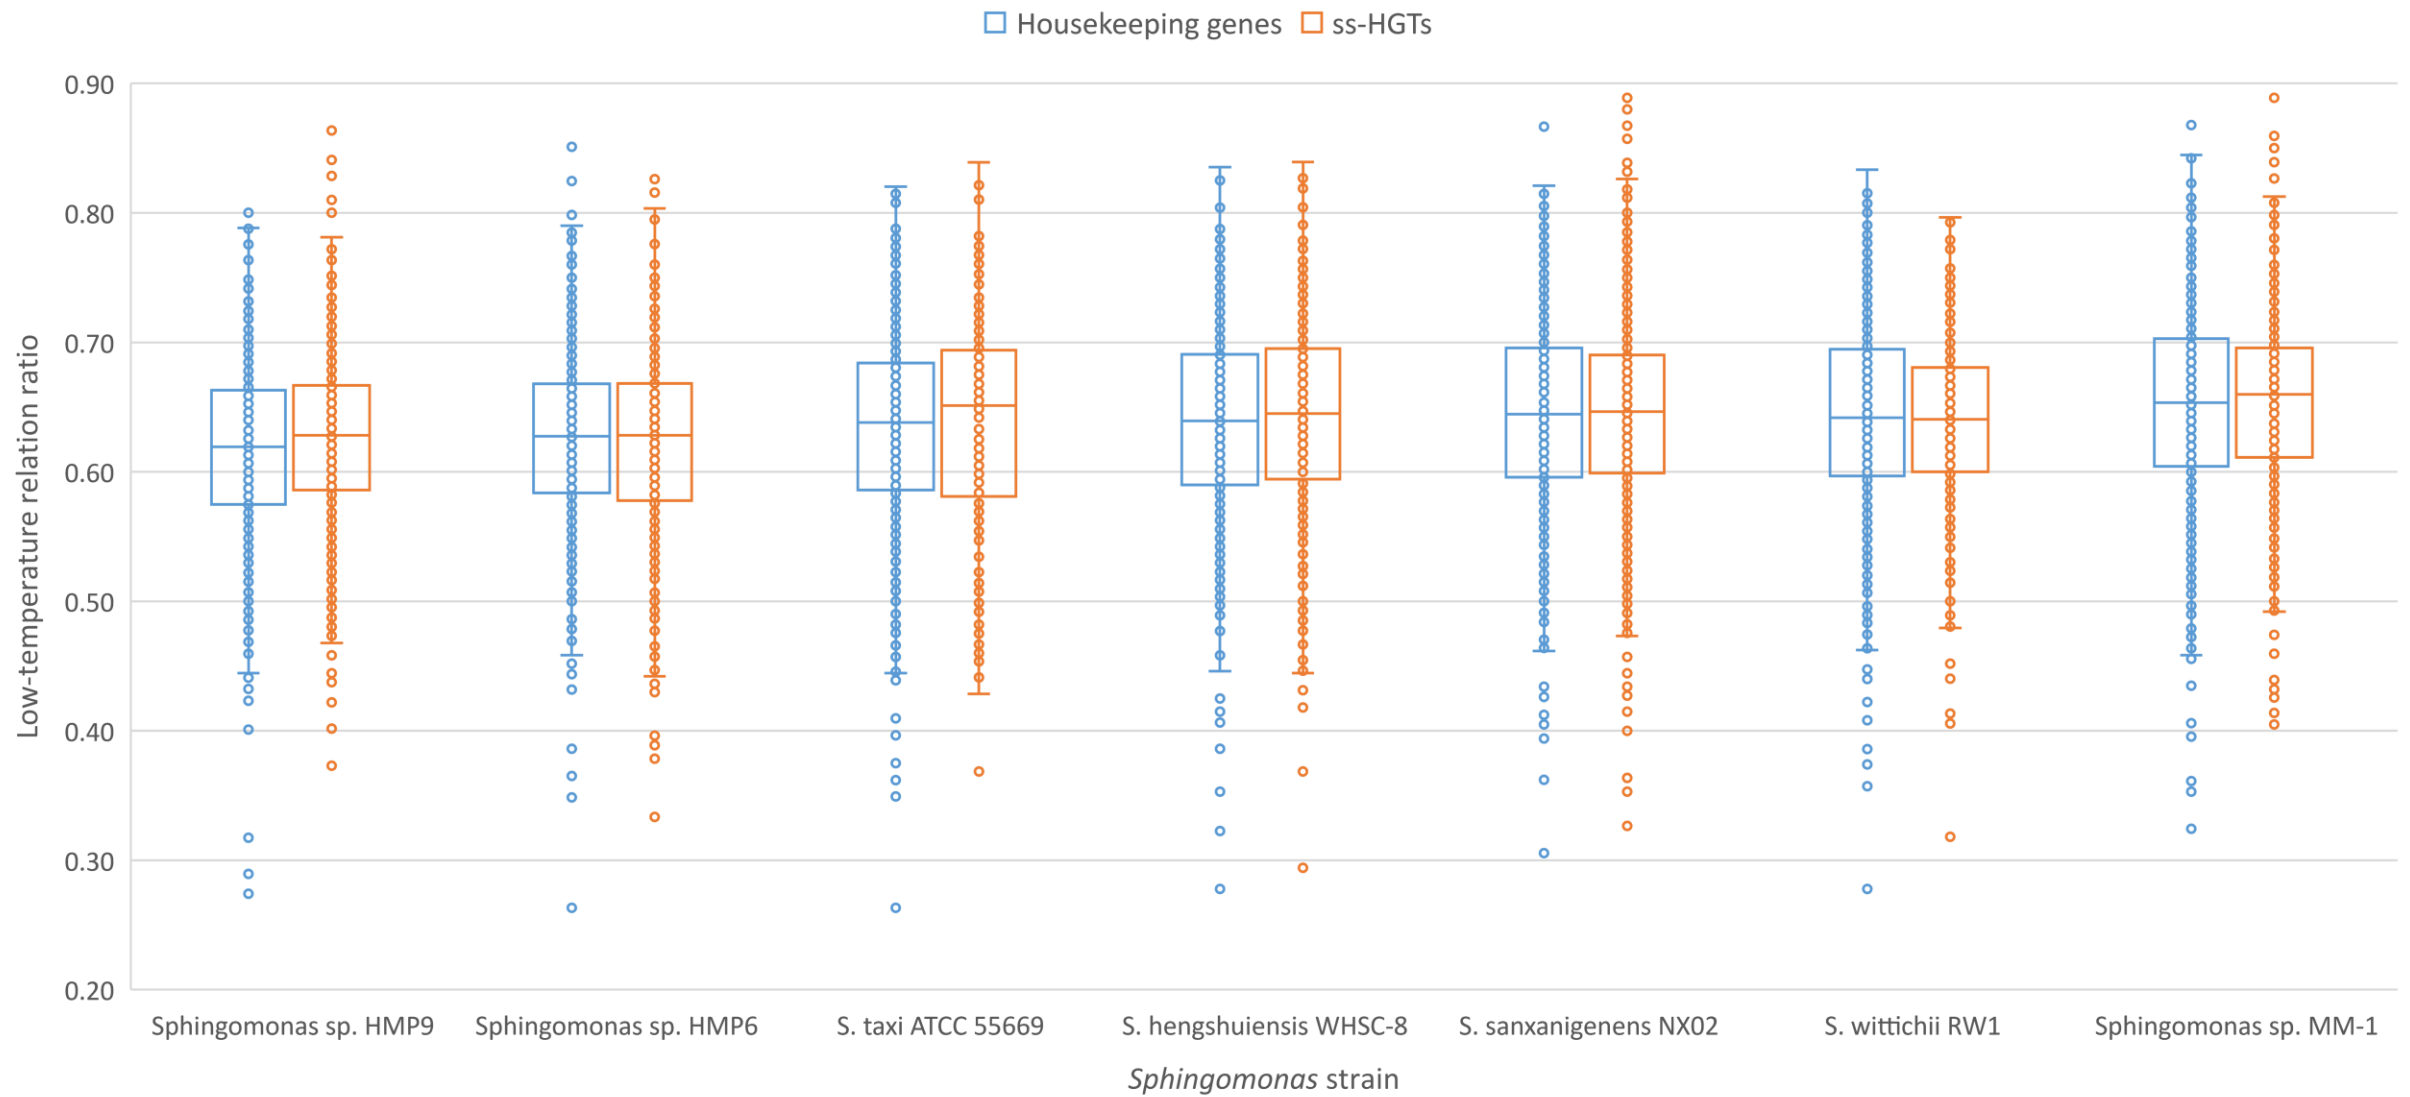

Supplementary Figure 8. Boxplot of individual low-temperature relation ratio values of the housekeeping genes and ss-HGTs in each *Sphingomonas* strain. Clear blue: housekeeping genes; clear orange: ss-HGTs
